# Supplementary figures and images for: Exploring the Link between Inflammatory Biomarkers and Head and Neck Cancer: Understanding the Impact of Smoking as a Cancer-Predisposing Factor
Source: MDPI journal article supplement (doi:10.3390/biomedicines12040748), 2024-03-27

Head and neck cancer (HNC) smoking group

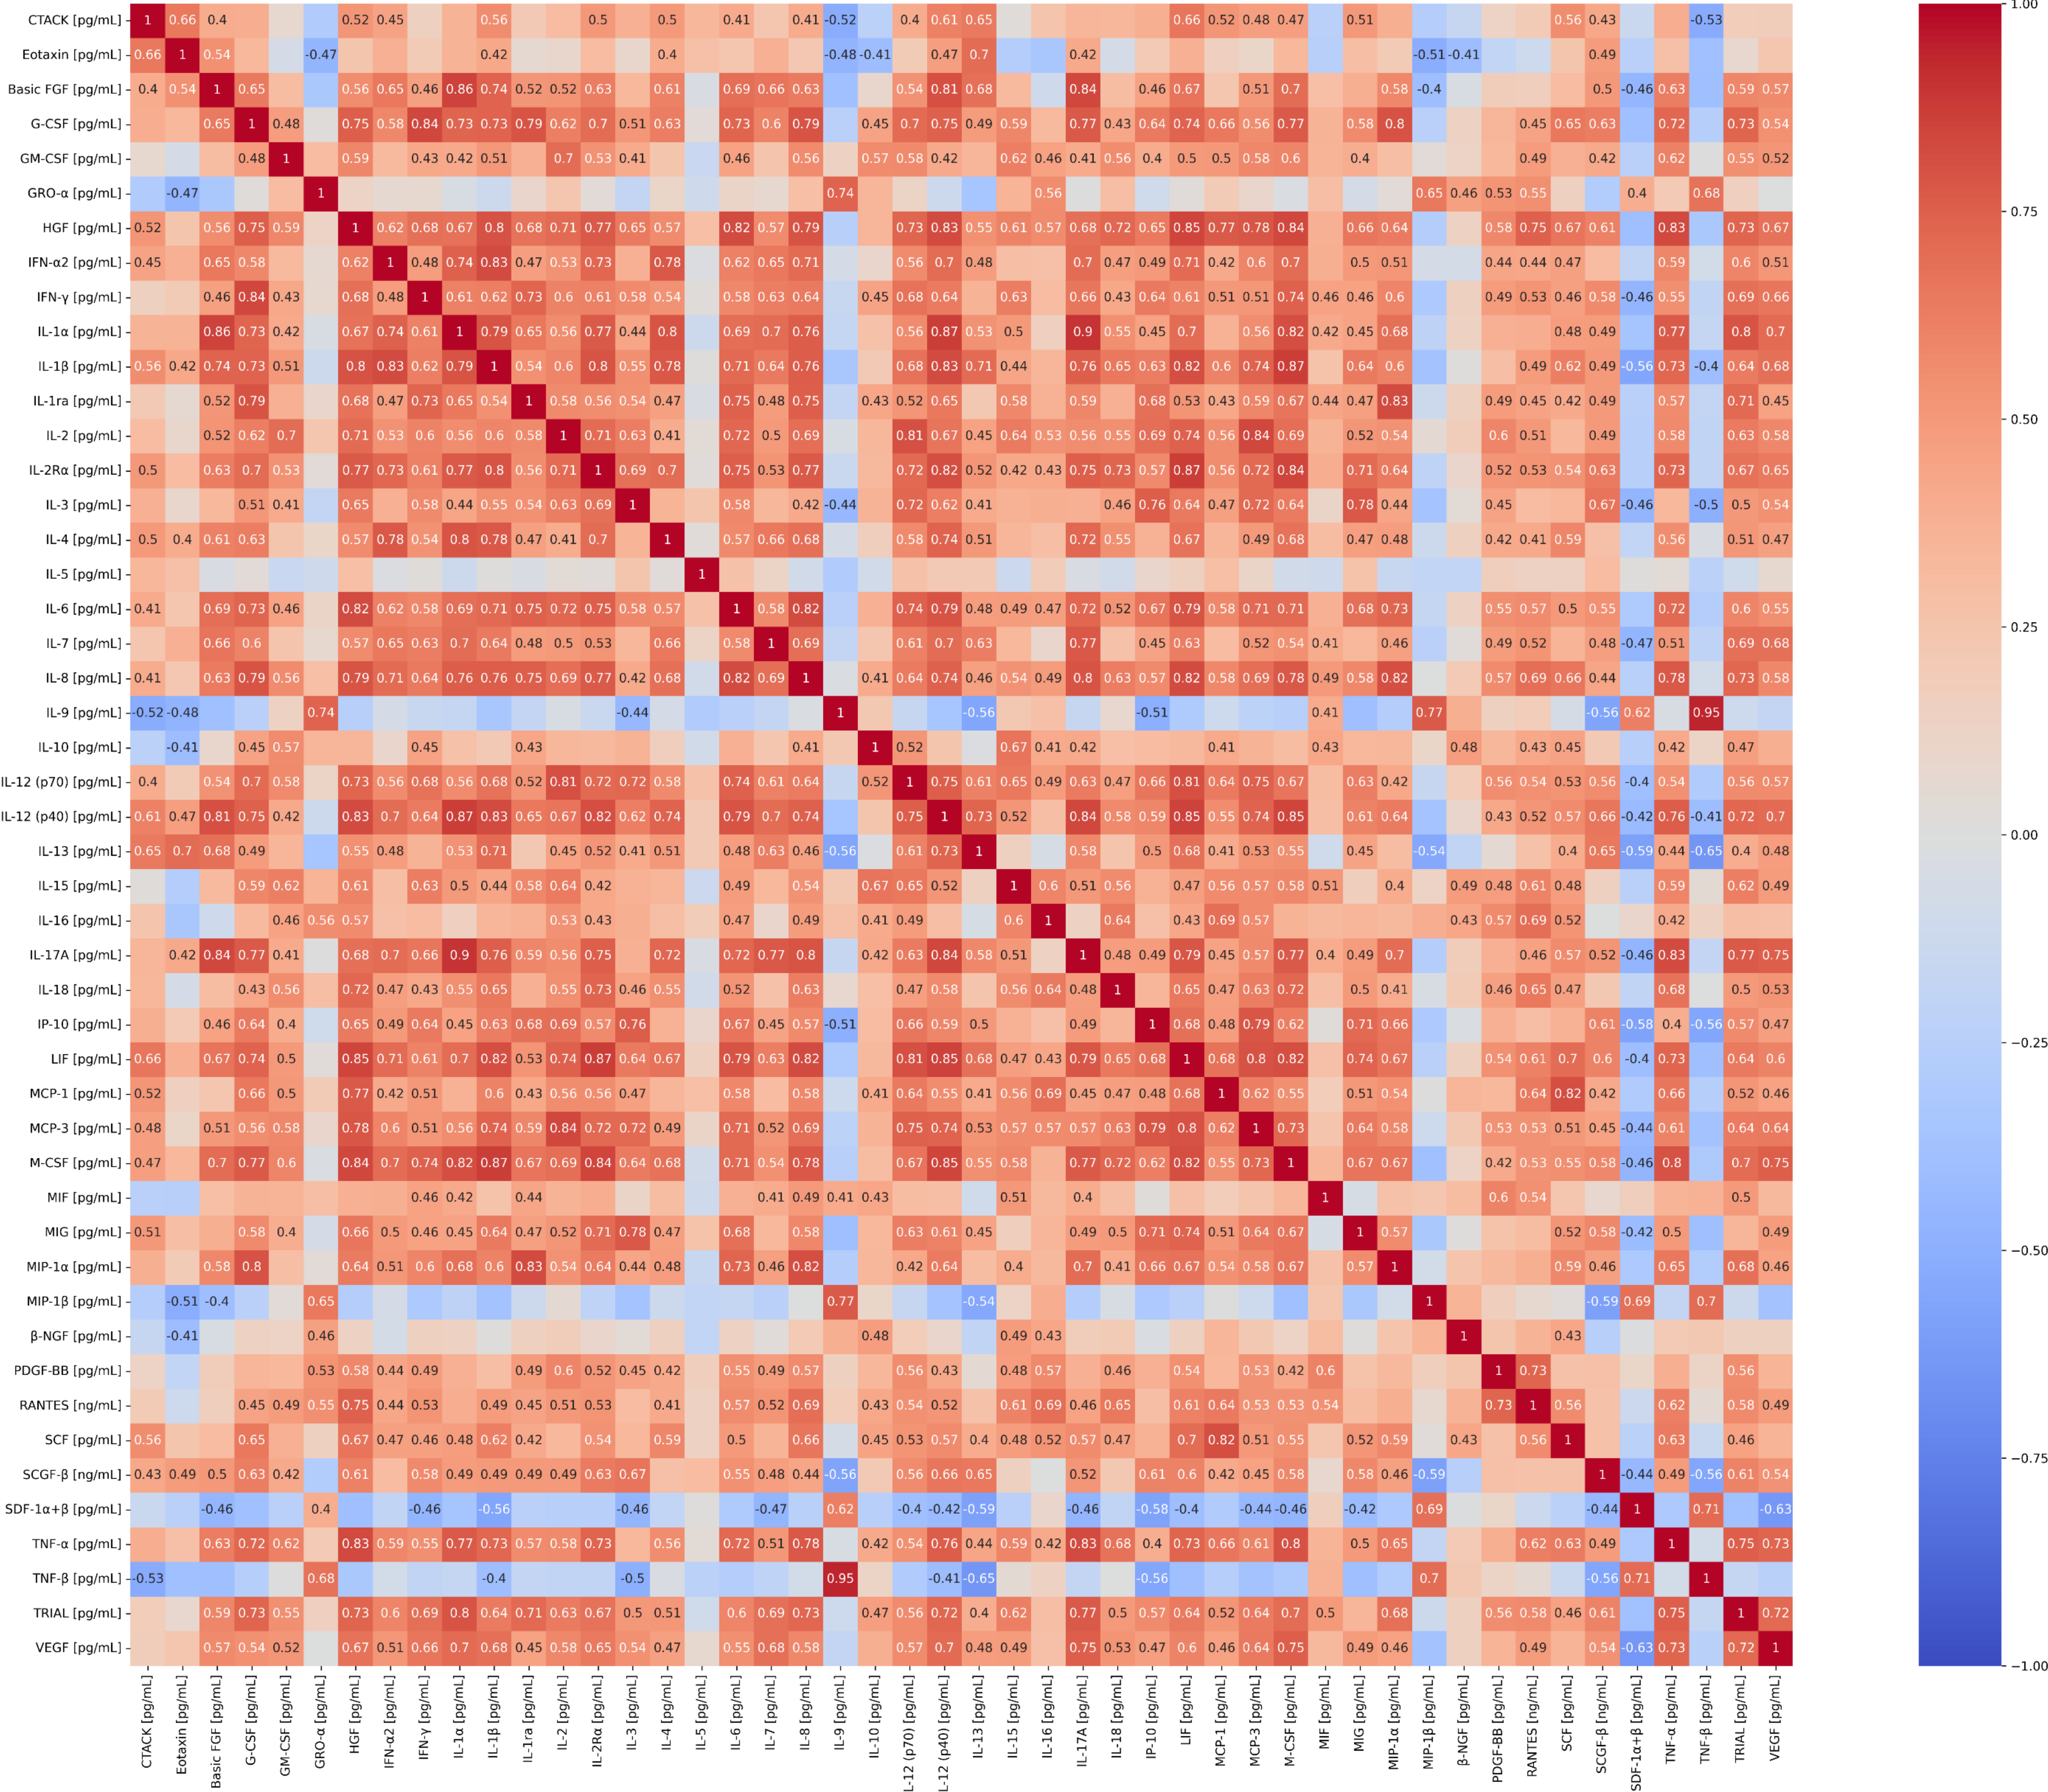



Head and neck cancer (HNC) non-smoking group

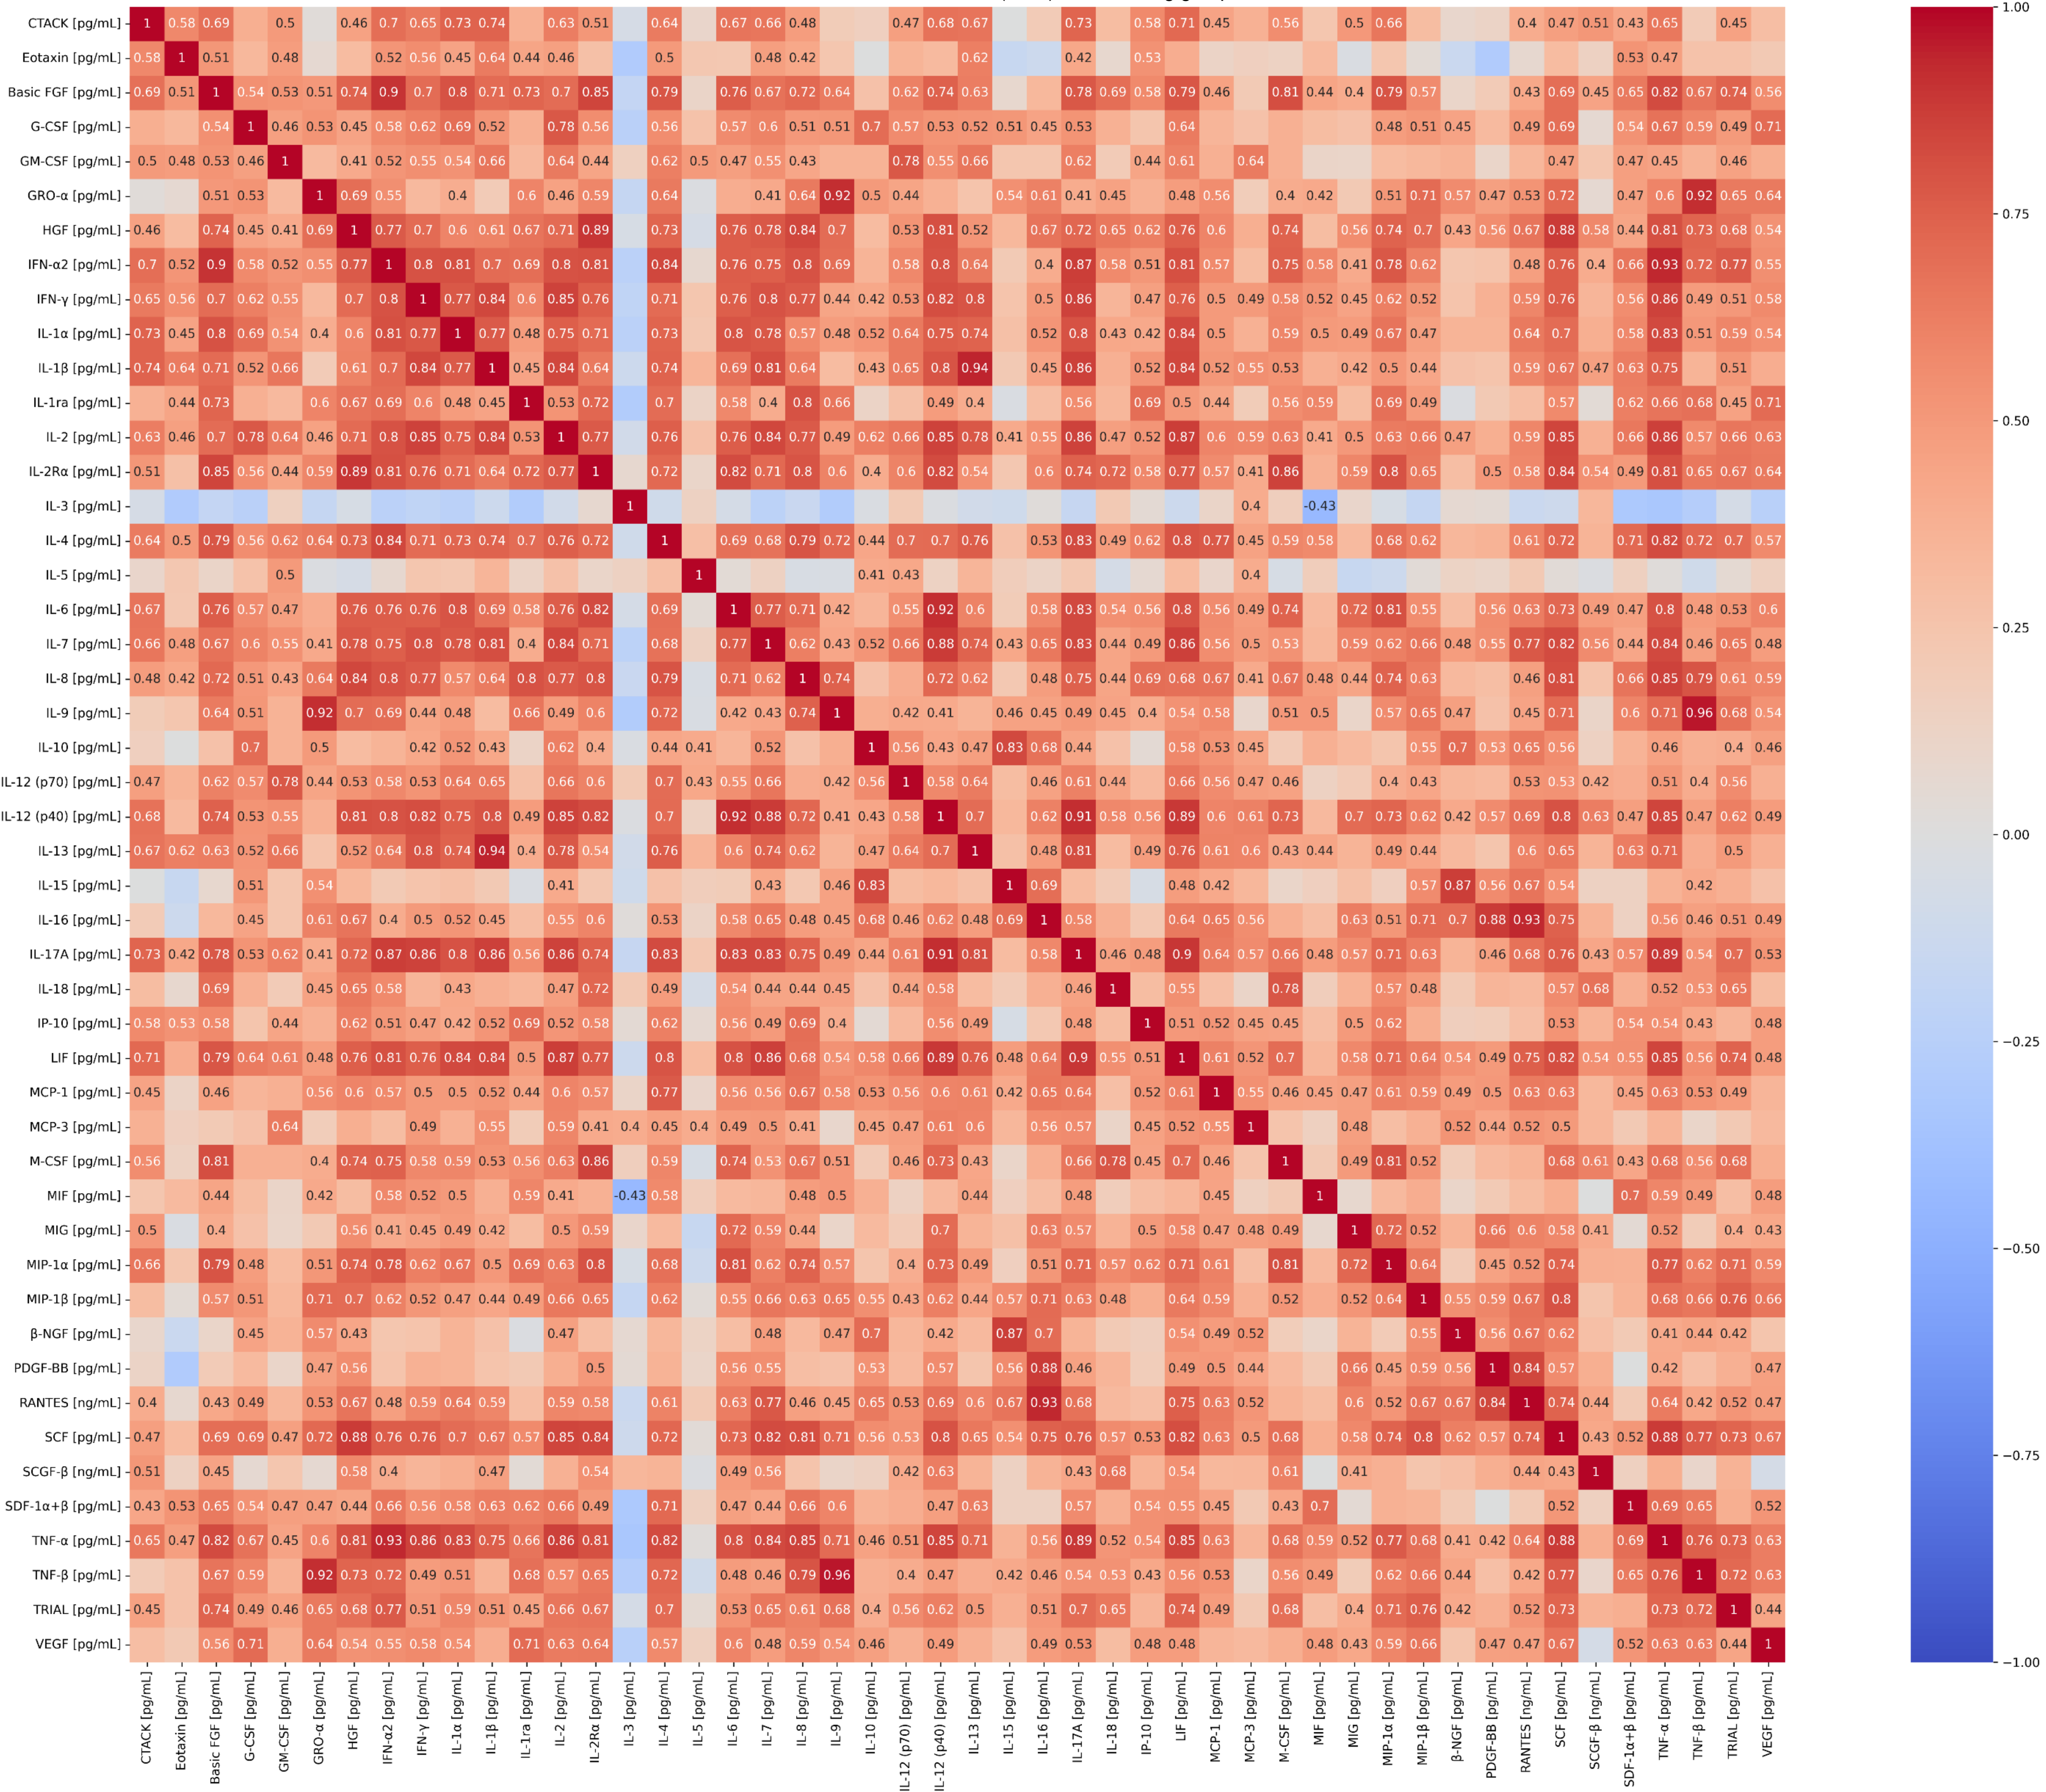



Control group

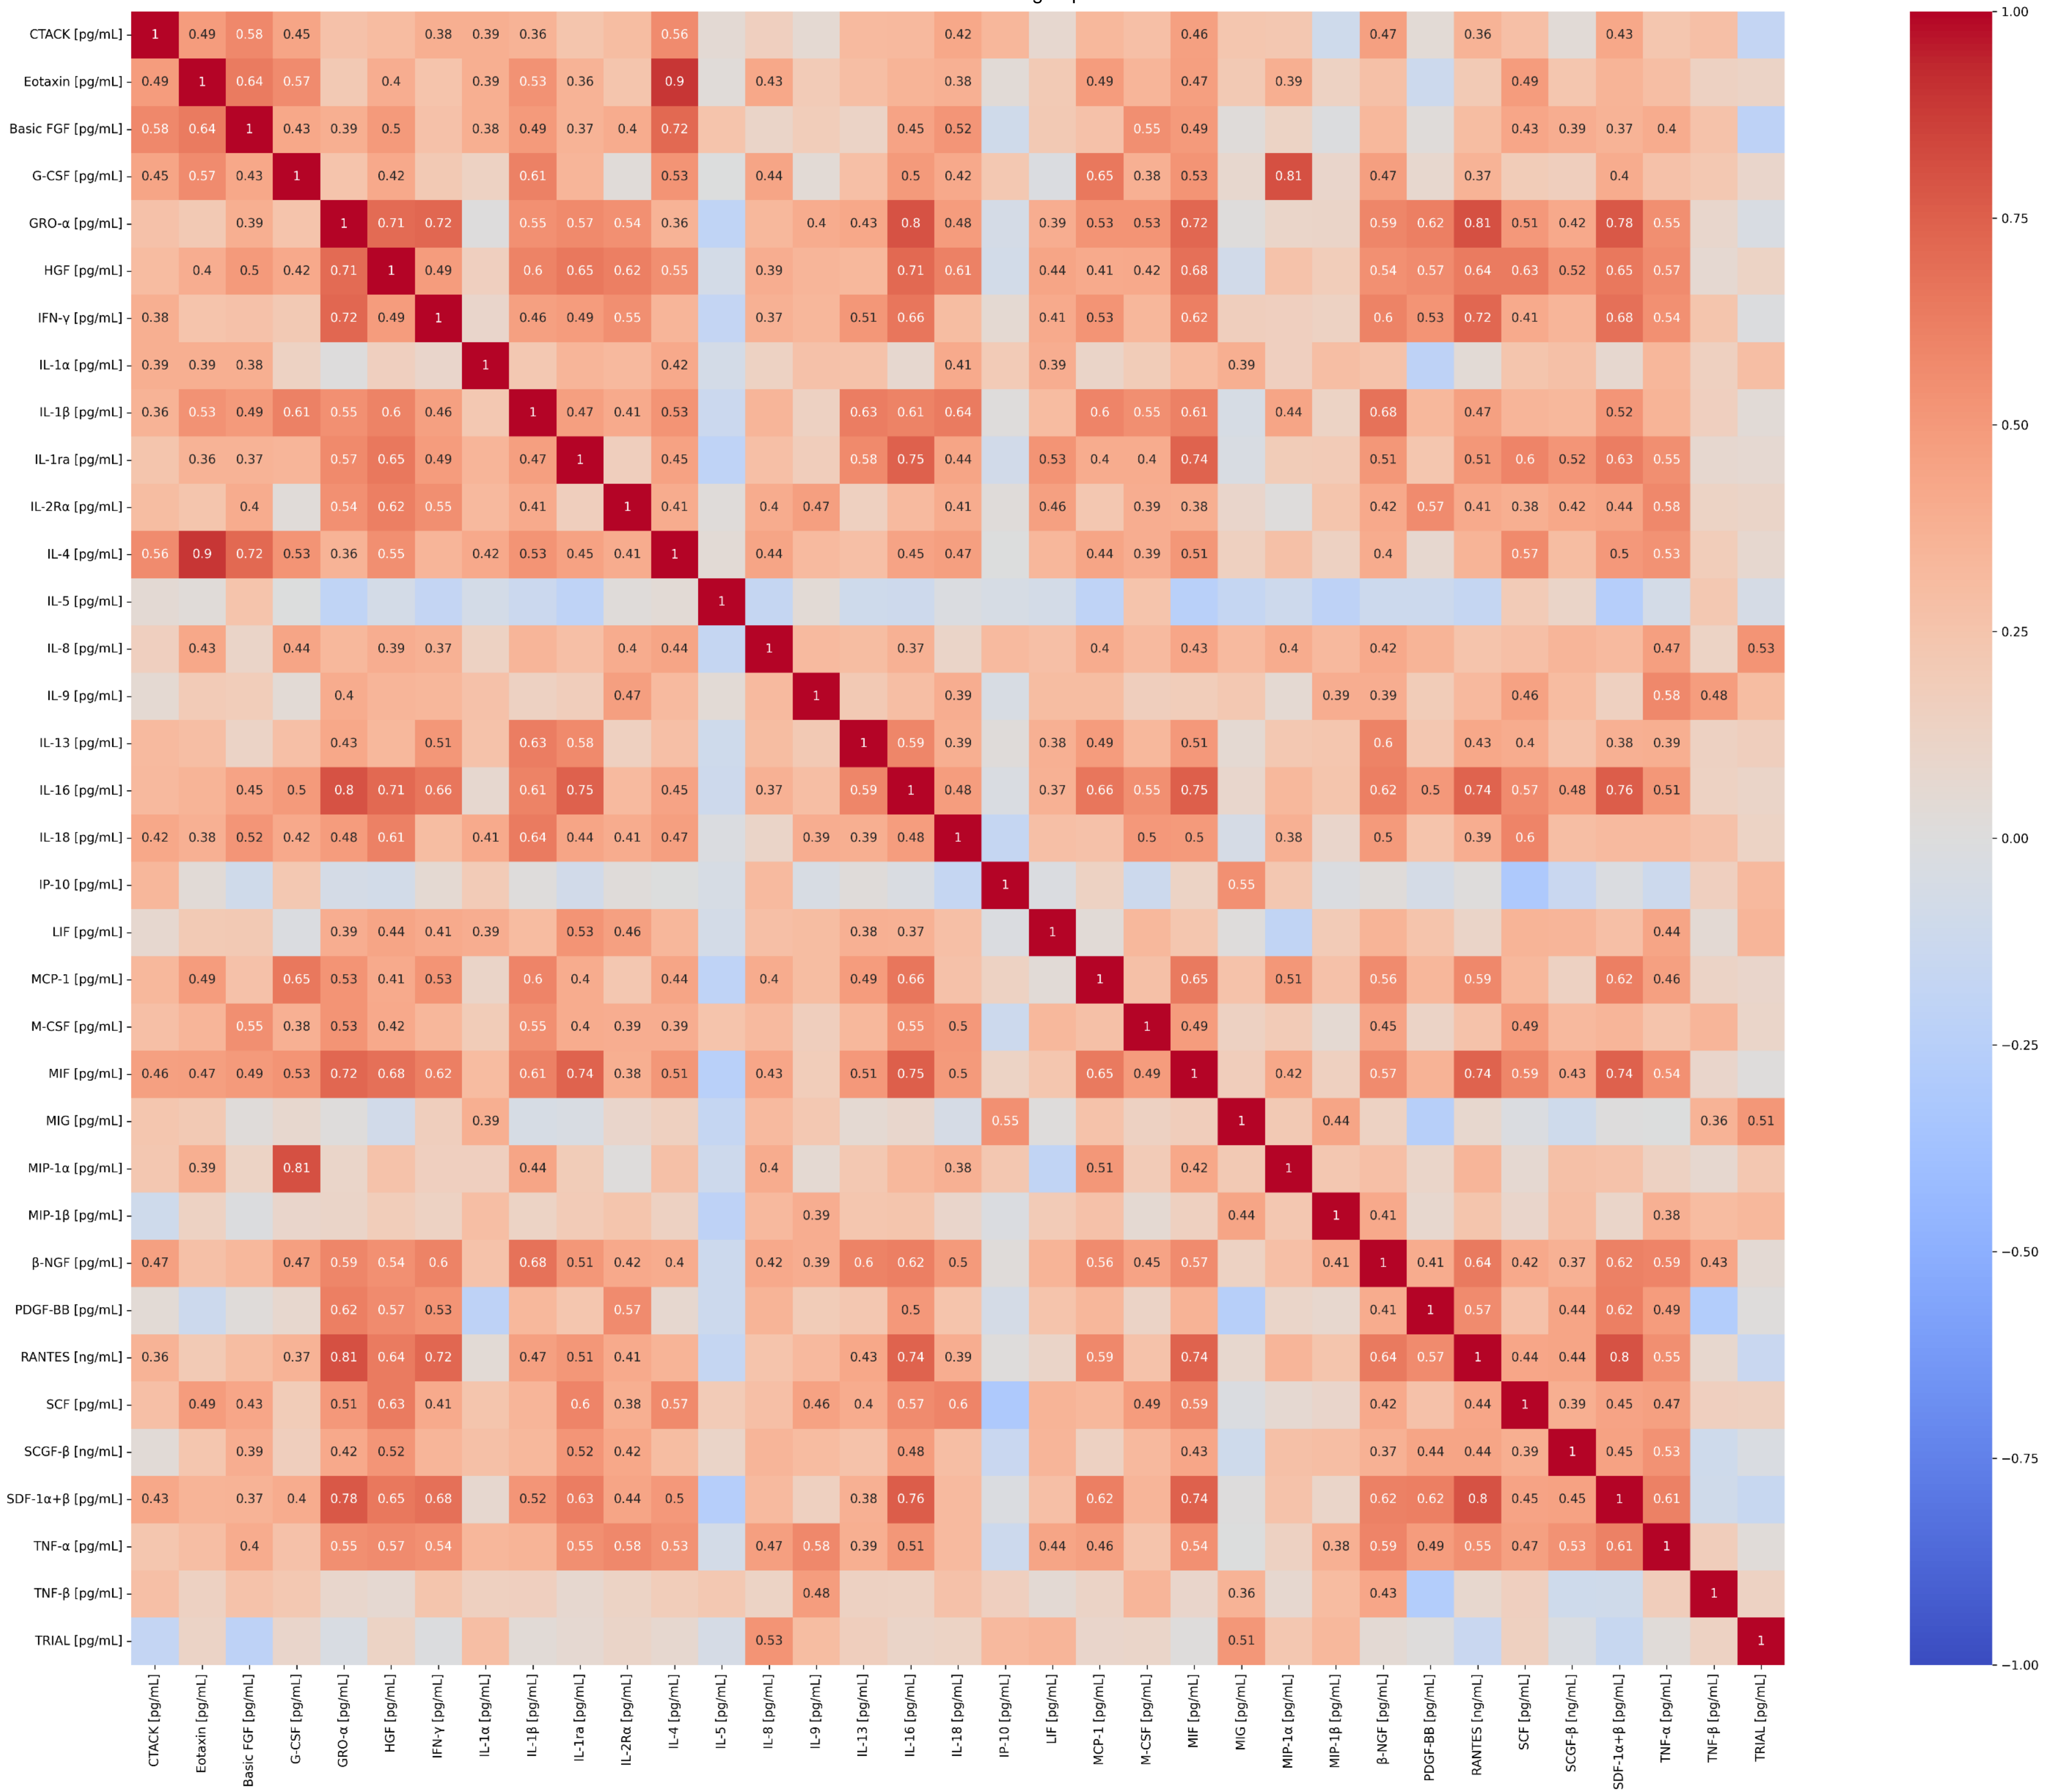

Supplement: s1 [file s1]
